# Supplementary material for: Binuclear Co(ii)Co(ii), Co(ii)Co(iii) and Co(iii)Co(iii) complexes of “short” salen homologues derived from the condensation of salicylaldehyde and methanediamine or phenylmethanediamines. Synthesis, structures and magnetismElectronic supplementary information (ESI) available: Appendix, derivation of the expression for the average magnetic susceptibility of a Co(ii)Co(ii) dimer. See http://www.rsc.org/suppdata/dt/b1/b105594c/
Source: Royal Society of Chemistry journal article supplement (doi:10.1039/b105594c), 2001-11-22
Supplement: b105594c.doc [file b105594c.doc]

Binuclear Co(II)-Co(II), Co(II)-Co(III) and Co(III)-Co(III) complexes of “short” salen homologues derived from the condensation of salycilaldehyde and methanediamine or phenylmethanediamines. Synthesis, structures and magnetism. §

Brunetto Chiari,a Antonio Cinti,a Ornella Crispu,b Francesco Demartin,*c Alessandro Pasini,*b and Olivo Piovesana.*a

*a Dipartimento di Chimica, via Elce di sotto 8, 06100, Perugia, Italy. E-mail:  piovol@unipg.it*

*b Dipartimento di Chimica Inorganica, Metallorganica e Analitica and CNR centre, via Venezian 21, 20133 Milano, Italy. E-mail: alessandro.pasini@unimi.it*

*c Dipartimento di Chimica Strutturale e Stereochimica Inorganica, via Venezian 21, 20133, Milano Italy. E-mail: demartin@csmtbo.mi.cnr.it*

**APPENDIX**

**Derivation of the expression for the average magnetic susceptibility of a Co(II)-Co(II) dimer.**

The S, Ms> spin functions for the pair (S = 3, 2, 1, 0; Ms = -S, ...,0, ...S) have been expressed as linear combinations of the Ms1, Ms2> product functions with use of the Clebsch-Gordon coefficients.1 Diagonalisation of the **H**0 hamiltonian in Equation 3 is easily achieved within this S, Ms> basis set and provides the zero-field eigenvalues, E0(n), and eigenfunctions (n) listed in table A1.

The z and x components of the magnetic susceptibility were obtained with use of the van Vleck equation, whose general form is:

u = (Ngu2/Z) n[E1(n)2/kT-2E2(n)]exp-E0(n)/kT (A 1)

where u = x, y or z. For an external magnetic field applied along the z direction, the (n) are eigenfunctions of **S**z, <(n) gz(**S**1 + **S**2)z Hz(n)> = MsgzHz,, so that E1(n) = Ms and E2(n) = 0. Then z has the following form:

z = (0.26073 g2 kT) [18 exp-E0(1)/kT + 8 exp-E0(3)/kT + 2 exp-E0(5)/kT + 10

+ 2 exp-E0(13)/kT]/Z (A 2)

where Z, the partition function, is given by n exp-E0(n)/kt, and J and D are expressed in cm-1.

x was obtained by inserting the E1(n) and E2(n) coefficients listed in Table A1, calculated by making use of the **S**x = (**S+ + S-)/**2 operator and second order perturbation theory, in eq A 1.

The final expression for , the average magnetic susceptibility per mole of dimers is  = z + 2x.

1. O. Kahn, in *Molecular magnetism*, VCH Publisher, 1993, appendix 6.

| **Table A1**. E0(n), E1(n) and E2(n) coefficients for the calculation of the x susceptibility. | | | | |
| --- | --- | --- | --- | --- |
| n | E0(n) a | (n) b | E1(n) | E2(n) |
| 1, 2 | -6J-2D | 3,±3> | 0 | -1.5/E0(3)-E0(1) |
| 3,4 | -6J | 3,±2> | 0 | -1.5/E0(1)-E0(3)-2.5 C52/E0(5)-E0(3) |
| 5,6 | -J-0.2D- | C53,±1>+ C61,±1> | 0 | -2.5C52/E0(3)-E0(5)  -(3 C5C1+0.5 C2C6)2/E0(7)-E0(5)  - (0.5 C1C6-3 C2C5)2/E0(15)-E0(5) |
| 7 | J-0.2D- | C13,0>+C21,0> | 0 | -2(3 C1C5 + 0.5 C2C6)2/E0(5)- E0(7) |
|  |  |  |  | -2(0.5 C2C5-3 C1 C 6)2 /(E0(13)-E0(7) |
| 8,9 | 0 | 2,±2> | 1 | 0 |
| 10,11 | 0 | 2,±1> | -1 | -1.5[C32/(E0(12)-E0(10)+C42/E0(16)- E0(10)] |
| 12 | 3J - ’ | C32,0> + C40,0> | 0 | -3C33/E0(10)- E0(12) |
| 13,14 | -J - 0.2D + ’’ | C5 1,±1> - C6 3,±1> | 0 | -2.5C62/E0(3)- E0(13)  -(0.5 C2C5 - 3 C1C6)2/E0(7)- E0(13)  -(0.5 C1C5 + 3 C2C6)2/E0(15)- E0(13) |
| 15 | J + 0.02D +  | C1 1,0> - C23,0> | 0 | -2(0.5 C1C6 - 3 C2C5)2/E0(5)- E0(15)  -2(0.5 C1C5+ 3 C2C6)2E0(13)- E0(15) |
| 16 | 3J + ’ | C3 0,0> - C4 2,0> | 0 | -3C42/E0(10)- E0(16) |
| a  = [25 J2 + 2.5 D2 - 15.72 JD]1/2; ’ = (9J2 + 4D2)1/2; ’’ = (25 J2 + D2 + 10 JD)1/2.  b C1 = CA1/N1, C2 = CA2/N1, where CA1 = -7J + 1.58 D - , CA2 = D1.5 and N1 = (CA12 + CA22)1/2.  C3 = CA3/N2, C4 = CA4/N2 where CA3 = -3J - ’, CA4 = 2D and N2 = (CA32 + CA42)1/2.  C5 = CA5/N3, C6 = CA6/N3 where CA5 = -5J - D + ’’, CA6 = D 1.5 and N3 = (CA52 + CA62)1/2 | | | | |
